# Supplementary material for: Iodine capture of a two-dimensional layered uranyl–organic framework: a combined DFT and AIMD study
Source: Royal Society of Chemistry journal article supplement (doi:10.1039/d4cp01898b), 2024-01-01
Supplement: d4cp01898b1.pdf [file d4cp01898b1.pdf]

## Supporting Information

### Iodine capture of two-dimensional layered uranyl-organic framework: A combined DFT and AIMD study

Mingyang Shi<sup>a</sup>, Kunyang Cheng<sup>b</sup>, Xiujuan Cheng<sup>b</sup>, Xuying Zhou<sup>b</sup>, Gang Jiang<sup>b</sup>, Jiguang  
Du<sup>a,\*</sup>

<sup>a</sup> College of Physics, Sichuan University, Chengdu 610064, China

<sup>b</sup> Institute of Atomic and Molecular Physics, Sichuan University, Chengdu 610065, China

### Table of contents

|                 |     |
|-----------------|-----|
| Table S1 .....  | S2  |
| Figure S1 ..... | S3  |
| Table S2 .....  | S4  |
| Table S3 .....  | S5  |
| Table S4 .....  | S7  |
| Table S5 .....  | S9  |
| Table S6 .....  | S11 |
| Table S7 .....  | S12 |
| Table S8 .....  | S14 |
| Table S9 .....  | S15 |
| Figure S2 ..... | S15 |
| Figure S3 ..... | S16 |

---

\* corresponding author:  
E-mail: dujg@scu.edu.cn

**Table S1.** The Cartesian coordinates of optimized structures for cluster model at PBE-D3 level of theory.

| atom | <i>x</i>    | <i>y</i>    | <i>z</i>   |
|------|-------------|-------------|------------|
| U    | 43.10384670 | 15.70164184 | 3.75622923 |
| O    | 43.35867208 | 15.73579128 | 5.53657113 |
| O    | 43.00306901 | 15.64260441 | 1.97669866 |
| O    | 42.93292120 | 13.18676797 | 3.81366768 |
| O    | 45.01568408 | 13.92742021 | 3.76606752 |
| C    | 44.16337345 | 12.96789627 | 3.82731891 |
| H    | 44.54717583 | 11.91444945 | 3.89280798 |
| O    | 41.19615404 | 17.14051210 | 3.91312211 |
| O    | 40.83743079 | 14.96906041 | 4.00837040 |
| N    | 32.51036804 | 17.17116051 | 4.69329522 |
| N    | 33.72478122 | 15.10231076 | 4.67200271 |
| N    | 31.33581361 | 15.08833412 | 4.89782261 |
| N    | 30.16616443 | 17.05053148 | 4.91644438 |
| H    | 29.41615264 | 16.36341107 | 5.01691556 |
| N    | 34.78478079 | 17.20070538 | 4.48085165 |
| H    | 34.56170040 | 18.19821762 | 4.45914932 |
| N    | 32.62133611 | 13.11164621 | 4.86629111 |
| H    | 33.59227514 | 12.80174741 | 4.78740750 |
| H    | 28.38900496 | 22.07506314 | 4.84460348 |
| C    | 28.77156057 | 21.04390616 | 4.85784164 |
| C    | 28.37741543 | 18.64889588 | 5.00611690 |
| H    | 27.67877228 | 17.80277845 | 5.10972513 |
| C    | 30.65319193 | 19.48435079 | 4.75774638 |
| H    | 31.72594639 | 19.28257756 | 4.66834084 |
| C    | 27.88915417 | 19.95929805 | 4.98974038 |
| H    | 26.80608574 | 20.13234173 | 5.08110703 |
| C    | 30.14713761 | 20.79159350 | 4.74308460 |
| H    | 30.85137979 | 21.63143904 | 4.63876969 |
| C    | 29.76495965 | 18.39333687 | 4.89049455 |
| C    | 31.39374882 | 16.44429461 | 4.83024672 |
| C    | 32.52458042 | 14.47871206 | 4.81347777 |
| C    | 33.64997591 | 16.43609245 | 4.61974739 |
| C    | 31.66504207 | 12.09629967 | 5.00538014 |
| C    | 31.25866551 | 9.68951618  | 5.15182740 |
| H    | 31.65458679 | 8.66262827  | 5.15761729 |
| C    | 30.27670839 | 12.32671500 | 5.13297614 |
| H    | 29.91119821 | 13.35912091 | 5.12346497 |
| C    | 32.14341479 | 10.76403717 | 5.01655889 |
| H    | 33.22496717 | 10.57709342 | 4.91701496 |

|   |             |             |            |
|---|-------------|-------------|------------|
| C | 29.40369584 | 11.23815965 | 5.26775318 |
| H | 28.32454547 | 11.43301515 | 5.36626891 |
| C | 29.87871248 | 9.91783298  | 5.27885294 |
| H | 29.18170062 | 9.07362104  | 5.38525040 |
| C | 36.63990320 | 15.55197569 | 4.36964959 |
| H | 35.93279053 | 14.72083214 | 4.46024606 |
| C | 36.13878458 | 16.87604126 | 4.37112388 |
| C | 38.41668476 | 17.72929261 | 4.13840526 |
| H | 39.12646867 | 18.56412650 | 4.04643252 |
| C | 38.91635490 | 16.41070503 | 4.13738920 |
| C | 38.01470287 | 15.33456709 | 4.25314104 |
| H | 38.41884892 | 14.31152459 | 4.24917472 |
| C | 37.04767132 | 17.95902709 | 4.25352629 |
| H | 36.66055232 | 18.99083497 | 4.25344173 |
| C | 40.37227903 | 16.16338941 | 4.01515516 |
| O | 43.74513544 | 18.13845229 | 3.60529567 |
| O | 45.47863261 | 16.76709126 | 3.64372713 |
| H | 45.68298800 | 18.82794573 | 3.62274732 |
| C | 44.98056455 | 17.95156871 | 3.62443342 |
| N | 46.94883686 | 15.12707000 | 5.02263688 |
| H | 46.31772759 | 14.38912746 | 4.56030683 |
| H | 46.57617963 | 15.98436840 | 4.48960267 |
| C | 48.37398555 | 14.88265155 | 4.74034005 |
| H | 48.98828437 | 15.71705407 | 5.13032350 |
| H | 48.70098561 | 13.93993552 | 5.21998724 |
| H | 48.51730744 | 14.80421451 | 3.64676791 |
| C | 46.58021920 | 15.25119926 | 6.44984385 |
| H | 45.48935771 | 15.43277812 | 6.51063363 |
| H | 46.83640911 | 14.31816400 | 6.98764004 |
| H | 47.12755972 | 16.09745253 | 6.90781400 |

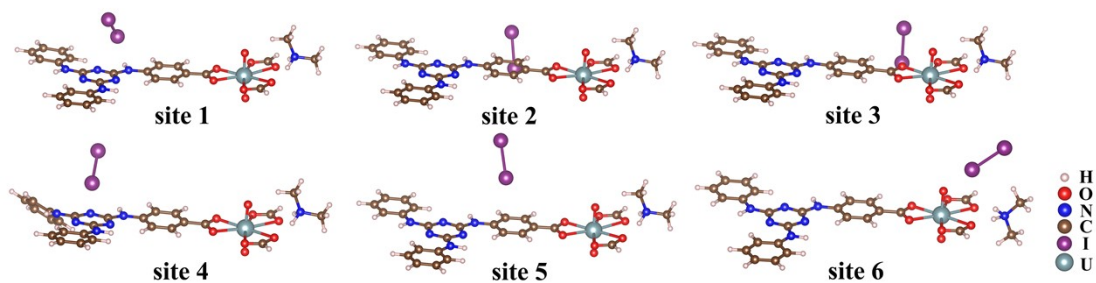

**Figure S1.** Optimized structures of  $I_2$  molecule adsorbed at different sites on cluster model at PBE-D3 level of theory.

**Table S2.** The Cartesian coordinates of optimized structures of I<sub>2</sub> molecule adsorbed at site 1 on cluster model at PBE-D3 level of theory.

| atom | <i>x</i>    | <i>y</i>    | <i>z</i>   |
|------|-------------|-------------|------------|
| U    | 43.09268636 | 15.68690852 | 3.67718042 |
| O    | 43.27521232 | 15.74053196 | 5.46620635 |
| O    | 43.06421179 | 15.60859877 | 1.89571347 |
| O    | 42.92197093 | 13.17084269 | 3.75593033 |
| O    | 45.00355044 | 13.91606230 | 3.78207379 |
| C    | 44.15097519 | 12.95566618 | 3.82587993 |
| H    | 44.53356698 | 11.90453260 | 3.92727365 |
| O    | 41.17794592 | 17.12236972 | 3.74456090 |
| O    | 40.82273578 | 14.95094640 | 3.85042047 |
| N    | 32.48864294 | 17.13013239 | 4.49543610 |
| N    | 33.71857605 | 15.07150824 | 4.52815349 |
| N    | 31.33943165 | 15.05161609 | 4.84010268 |
| N    | 30.15834810 | 17.00740290 | 4.83179202 |
| H    | 29.41931423 | 16.32286165 | 5.00443297 |
| N    | 34.75846947 | 17.16772805 | 4.23095560 |
| H    | 34.53365602 | 18.16636540 | 4.18797264 |
| N    | 32.63771041 | 13.08279843 | 4.83507214 |
| H    | 33.60772474 | 12.77647655 | 4.73405721 |
| H    | 28.39578469 | 22.03732974 | 4.79079258 |
| C    | 28.77382768 | 21.00440974 | 4.79275622 |
| C    | 28.39026951 | 18.61737719 | 5.06138007 |
| H    | 27.70517972 | 17.78011958 | 5.27226588 |
| C    | 30.62554383 | 19.42926610 | 4.53179164 |
| H    | 31.68110313 | 19.21907780 | 4.33004014 |
| C    | 27.90761287 | 19.93021871 | 5.05503848 |
| H    | 26.84185741 | 20.11370443 | 5.25973119 |
| C    | 30.12697608 | 20.73891194 | 4.53323696 |
| H    | 30.82263823 | 21.56744692 | 4.32787368 |
| C    | 29.75583935 | 18.34965367 | 4.80258060 |
| C    | 31.38494393 | 16.40395109 | 4.71182625 |
| C    | 32.52901453 | 14.44687482 | 4.73396258 |
| C    | 33.63320283 | 16.40233739 | 4.42263059 |
| C    | 31.69449939 | 12.06798848 | 5.04549961 |
| C    | 31.31053332 | 9.66614637  | 5.29810728 |
| H    | 31.71381876 | 8.64257380  | 5.32929204 |
| C    | 30.30963328 | 12.29480729 | 5.21246782 |
| H    | 29.93690963 | 13.32405420 | 5.17583581 |
| C    | 32.18232822 | 10.73978702 | 5.09094843 |
| H    | 33.26108323 | 10.55547243 | 4.96086933 |

|   |             |             |            |
|---|-------------|-------------|------------|
| C | 29.44969088 | 11.20717300 | 5.41923414 |
| H | 28.37318479 | 11.39942361 | 5.54752882 |
| C | 29.93418756 | 9.89100428  | 5.46444442 |
| H | 29.24738704 | 9.04741898  | 5.62725130 |
| C | 36.62007045 | 15.52360863 | 4.15061651 |
| H | 35.91513504 | 14.69036573 | 4.23753259 |
| C | 36.11465084 | 16.84610531 | 4.14032490 |
| C | 38.39241380 | 17.70538358 | 3.93264130 |
| H | 39.10051931 | 18.54247043 | 3.84856097 |
| C | 38.89656045 | 16.38832141 | 3.94288101 |
| C | 37.99678345 | 15.30987294 | 4.05195394 |
| H | 38.40396447 | 14.28805701 | 4.05703421 |
| C | 37.02161886 | 17.93186175 | 4.03001198 |
| H | 36.62928015 | 18.96116032 | 4.02949860 |
| C | 40.35402872 | 16.14446660 | 3.84148567 |
| O | 43.73853047 | 18.12175978 | 3.52583344 |
| O | 45.47055963 | 16.75335773 | 3.65130673 |
| H | 45.67373186 | 18.81374642 | 3.60751832 |
| C | 44.97239807 | 17.93655156 | 3.59522447 |
| N | 46.88024384 | 15.12805283 | 5.10888267 |
| H | 46.26796358 | 14.38413942 | 4.63006272 |
| H | 46.52891078 | 15.97838667 | 4.55066679 |
| C | 48.31564411 | 14.88221899 | 4.88748145 |
| H | 48.91313256 | 15.71981777 | 5.29637069 |
| H | 48.62287463 | 13.94327610 | 5.38719829 |
| H | 48.50399511 | 14.79593186 | 3.80134365 |
| C | 46.45409589 | 15.26841100 | 6.51848404 |
| H | 45.36087395 | 15.44508613 | 6.53299866 |
| H | 46.69254410 | 14.34348335 | 7.07802650 |
| H | 46.97885869 | 16.12297748 | 6.98734677 |
| I | 33.62425104 | 19.46966824 | 7.34689388 |
| I | 34.24001552 | 21.00329636 | 5.19822305 |

**Table S3.** The Cartesian coordinates of optimized structures of I<sub>2</sub> molecule adsorbed at site 2 on cluster model at PBE-D3 level of theory.

| atom | x           | y           | z          |
|------|-------------|-------------|------------|
| U    | 43.10066403 | 15.66784004 | 3.78000255 |
| O    | 43.35109249 | 15.67385847 | 5.56156344 |
| O    | 43.00338735 | 15.63721913 | 1.99933395 |
| O    | 42.93458011 | 13.15032719 | 3.78992492 |
| O    | 45.01585239 | 13.89624350 | 3.77071734 |
| C    | 44.16523989 | 12.93428378 | 3.81469601 |
| H    | 44.55084819 | 11.88109139 | 3.87452099 |

|   |             |             |            |
|---|-------------|-------------|------------|
| O | 41.19199292 | 17.09789940 | 3.96013866 |
| O | 40.83748182 | 14.92457348 | 4.01935726 |
| N | 32.50959118 | 17.12628804 | 4.74041074 |
| N | 33.71803552 | 15.05427728 | 4.69298395 |
| N | 31.32838092 | 15.04440412 | 4.91289013 |
| N | 30.16450395 | 17.01005376 | 4.95300420 |
| H | 29.41193554 | 16.32428162 | 5.04275563 |
| N | 34.78455074 | 17.15184469 | 4.53502422 |
| H | 34.56613953 | 18.15069695 | 4.52847465 |
| N | 32.60848130 | 13.06456543 | 4.85875419 |
| H | 33.57870701 | 12.75312530 | 4.77712981 |
| H | 28.40571241 | 22.04159378 | 4.93538178 |
| C | 28.78442753 | 21.00893098 | 4.93778194 |
| C | 28.38135342 | 18.61381706 | 5.05815056 |
| H | 27.67945902 | 17.76910654 | 5.15077517 |
| C | 30.66062405 | 19.44376808 | 4.82355021 |
| H | 31.73283271 | 19.23921720 | 4.73378115 |
| C | 27.89785953 | 19.92609734 | 5.05574357 |
| H | 26.81523894 | 20.10203943 | 5.14701411 |
| C | 30.15930939 | 20.75291702 | 4.82272414 |
| H | 30.86697307 | 21.59113607 | 4.72900300 |
| C | 29.76820260 | 18.35447488 | 4.94221466 |
| C | 31.39066345 | 16.40103693 | 4.86360384 |
| C | 32.51579484 | 14.43271102 | 4.82329299 |
| C | 33.64761832 | 16.38919905 | 4.65958926 |
| C | 31.64900454 | 12.05032383 | 4.98142283 |
| C | 31.23499630 | 9.64290672  | 5.09360902 |
| H | 31.62786696 | 8.61485070  | 5.08595233 |
| C | 30.26103586 | 12.28306310 | 5.10942169 |
| H | 29.89876490 | 13.31666137 | 5.11348926 |
| C | 32.12325616 | 10.71651485 | 4.97508106 |
| H | 33.20445559 | 10.52771258 | 4.87517473 |
| C | 29.38449048 | 11.19539383 | 5.22726895 |
| H | 28.30572899 | 11.39218641 | 5.32630700 |
| C | 29.85546352 | 9.87357487  | 5.22100735 |
| H | 29.15571379 | 9.03007206  | 5.31429179 |
| C | 36.63767673 | 15.50056797 | 4.40148877 |
| H | 35.92999631 | 14.66857537 | 4.47923242 |
| C | 36.13808522 | 16.82516963 | 4.42241252 |
| C | 38.41573444 | 17.68009959 | 4.20355870 |
| H | 39.12295222 | 18.51848660 | 4.12395938 |
| C | 38.91456945 | 16.36157469 | 4.18084317 |
| C | 38.01236222 | 15.28399931 | 4.28077325 |

|   |             |             |            |
|---|-------------|-------------|------------|
| H | 38.41569078 | 14.26082764 | 4.26031105 |
| C | 37.04726198 | 17.90865267 | 4.32204643 |
| H | 36.66547811 | 18.94232557 | 4.33827235 |
| C | 40.36957984 | 16.11788028 | 4.04932408 |
| O | 43.73913721 | 18.10632555 | 3.66172190 |
| O | 45.47573887 | 16.73822810 | 3.69112683 |
| H | 45.67547907 | 18.79941852 | 3.69046058 |
| C | 44.97483308 | 17.92164768 | 3.68199472 |
| N | 46.94262029 | 15.08000961 | 5.05096167 |
| H | 46.31337853 | 14.34854452 | 4.57508607 |
| H | 46.57166609 | 15.94474597 | 4.52892676 |
| C | 48.36912879 | 14.84050112 | 4.77230001 |
| H | 48.98139258 | 15.66712514 | 5.18161367 |
| H | 48.69319945 | 13.88874832 | 5.23581307 |
| H | 48.51877196 | 14.78290480 | 3.67826435 |
| C | 46.56706148 | 15.18261846 | 6.47809354 |
| H | 45.47560450 | 15.36148749 | 6.53643996 |
| H | 46.82188345 | 14.24207420 | 7.00334584 |
| H | 47.11109962 | 16.02266617 | 6.95116301 |
| I | 38.15989002 | 21.85989609 | 4.79674907 |
| I | 38.21743827 | 21.26184487 | 2.15255635 |

**Table S4.** The Cartesian coordinates of optimized structures of I<sub>2</sub> molecule adsorbed at site 3 on cluster model at PBE-D3 level of theory.

| atom | <i>x</i>    | <i>y</i>    | <i>z</i>   |
|------|-------------|-------------|------------|
| U    | 43.11602729 | 15.66606439 | 3.73670966 |
| O    | 43.34802210 | 15.65007718 | 5.52105863 |
| O    | 43.03769972 | 15.65912226 | 1.95462026 |
| O    | 42.94205253 | 13.14887113 | 3.70961192 |
| O    | 45.02454389 | 13.89235326 | 3.71924257 |
| C    | 44.17220786 | 12.93089577 | 3.74003380 |
| H    | 44.55615822 | 11.87636297 | 3.78419265 |
| O    | 41.21294043 | 17.09991092 | 3.90883685 |
| O    | 40.84627036 | 14.92912423 | 3.95017671 |
| N    | 32.52706446 | 17.15251833 | 4.68368766 |
| N    | 33.73657240 | 15.08074041 | 4.66804341 |
| N    | 31.34862912 | 15.07361019 | 4.90478958 |
| N    | 30.18323802 | 17.03848535 | 4.91338586 |
| H    | 29.43201053 | 16.35376366 | 5.02081908 |
| N    | 34.80092435 | 17.17574108 | 4.46464520 |
| H    | 34.58100663 | 18.17400923 | 4.44448827 |
| N    | 32.62987272 | 13.09397748 | 4.88219694 |
| H    | 33.59985452 | 12.78155721 | 4.80146437 |

|   |             |             |            |
|---|-------------|-------------|------------|
| H | 28.41653901 | 22.06601660 | 4.80322105 |
| C | 28.79685298 | 21.03416570 | 4.82443444 |
| C | 28.39814951 | 18.64140228 | 4.99492911 |
| H | 27.69805972 | 17.79769006 | 5.10799666 |
| C | 30.67492968 | 19.46982029 | 4.73249555 |
| H | 31.74699508 | 19.26500031 | 4.64173287 |
| C | 27.91256731 | 19.95263773 | 4.96849483 |
| H | 26.83014252 | 20.12879582 | 5.06154298 |
| C | 30.17155582 | 20.77795140 | 4.70784971 |
| H | 30.87731212 | 21.61528643 | 4.59406954 |
| C | 29.78480531 | 18.38189317 | 4.87737089 |
| C | 31.40928455 | 16.42899754 | 4.82797396 |
| C | 32.53574490 | 14.46091357 | 4.81952580 |
| C | 33.66481217 | 16.41454184 | 4.60973645 |
| C | 31.67233372 | 12.08192958 | 5.03538543 |
| C | 31.26172544 | 9.67741751  | 5.20591006 |
| H | 31.65554989 | 8.64978422  | 5.21876547 |
| C | 30.28520121 | 12.31642646 | 5.16879176 |
| H | 29.92187179 | 13.34951426 | 5.15203941 |
| C | 32.14793153 | 10.74877148 | 5.05579418 |
| H | 33.22851212 | 10.55863952 | 4.95180599 |
| C | 29.41071135 | 11.23101590 | 5.31846282 |
| H | 28.33256384 | 11.42910700 | 5.42144569 |
| C | 29.88301028 | 9.90982117  | 5.33884345 |
| H | 29.18488034 | 9.06809813  | 5.45699535 |
| C | 36.65042111 | 15.52178989 | 4.33444582 |
| H | 35.94098655 | 14.69199078 | 4.41890315 |
| C | 36.15370458 | 16.84748890 | 4.35006765 |
| C | 38.43395166 | 17.69589959 | 4.12232471 |
| H | 39.14176172 | 18.53242041 | 4.03766768 |
| C | 38.92948709 | 16.37559179 | 4.10727132 |
| C | 38.02423218 | 15.30121992 | 4.21271432 |
| H | 38.42492848 | 14.27692294 | 4.19724114 |
| C | 37.06592351 | 17.92830319 | 4.24112715 |
| H | 36.68410327 | 18.96198668 | 4.25147740 |
| C | 40.38357654 | 16.12426953 | 3.98328289 |
| O | 43.76087792 | 18.09818381 | 3.66303828 |
| O | 45.50101424 | 16.73649727 | 3.68871116 |
| H | 45.69263420 | 18.79936073 | 3.72639999 |
| C | 44.99740018 | 17.91824994 | 3.69408142 |
| N | 46.94186091 | 15.04836838 | 5.04069716 |
| H | 46.31440442 | 14.32780081 | 4.54650615 |
| H | 46.58158925 | 15.92346519 | 4.52906725 |



|   |             |             |            |
|---|-------------|-------------|------------|
| C | 48.37010687 | 14.80672087 | 4.77236439 |
| H | 48.98179691 | 15.62329465 | 5.20215098 |
| H | 48.68509161 | 13.84556881 | 5.22251705 |
| H | 48.53057914 | 14.76743244 | 3.67906225 |
| C | 46.55216183 | 15.12683733 | 6.46559057 |
| H | 45.46108270 | 15.31036454 | 6.51625734 |
| H | 46.79630120 | 14.17488867 | 6.97514983 |
| H | 47.09613243 | 15.95439815 | 6.96020276 |
| I | 41.53746628 | 20.45162424 | 5.36183741 |
| I | 41.31551028 | 20.58345973 | 2.66667196 |

**Table S5.** The Cartesian coordinates of optimized structures of I<sub>2</sub> molecule adsorbed at site 4 on cluster model at PBE-D3 level of theory.

| atom | <i>x</i>    | <i>y</i>    | <i>z</i>   |
|------|-------------|-------------|------------|
| U    | 43.06907995 | 15.81463725 | 3.80118934 |
| O    | 43.28872487 | 15.45905425 | 5.55041257 |
| O    | 42.99743340 | 16.14463700 | 2.05037519 |
| O    | 42.89472093 | 13.34800975 | 3.30597372 |
| O    | 44.97713861 | 14.07441416 | 3.46063748 |
| C    | 44.12486039 | 13.12648737 | 3.29972662 |
| H    | 44.50797375 | 12.08161308 | 3.14907133 |
| O    | 41.15537401 | 17.18961283 | 4.24887352 |
| O    | 40.79597422 | 15.05336102 | 3.84523489 |
| N    | 32.45608182 | 17.02313266 | 5.02663478 |
| N    | 33.71015137 | 15.01781554 | 4.66441582 |
| N    | 31.33144668 | 14.91153184 | 4.96503959 |
| N    | 30.11075853 | 16.83765806 | 5.16386688 |
| H    | 29.37453051 | 16.15020449 | 5.33867345 |
| N    | 34.73838631 | 17.13148064 | 4.74338244 |
| H    | 34.53091151 | 18.11660051 | 4.94796322 |
| N    | 32.66982914 | 12.98793516 | 4.72561285 |
| H    | 33.64622126 | 12.71272933 | 4.59657045 |
| H    | 28.39894069 | 21.83639490 | 4.48492505 |
| C    | 28.76026425 | 20.80639805 | 4.61967350 |
| C    | 28.56234491 | 18.62450816 | 5.67561836 |
| H    | 28.05274170 | 17.94347891 | 6.37468841 |
| C    | 30.36513701 | 19.04894129 | 4.09043840 |
| H    | 31.24989692 | 18.70204644 | 3.54162335 |
| C    | 28.09411763 | 19.93101690 | 5.49206999 |
| H    | 27.20597786 | 20.27032024 | 6.04595195 |
| C    | 29.89177686 | 20.35627129 | 3.92229016 |
| H    | 30.41965786 | 21.03234598 | 3.23316066 |
| C    | 29.70380910 | 18.17570110 | 4.97952067 |

|   |             |             |            |
|---|-------------|-------------|------------|
| C | 31.34220569 | 16.26016899 | 5.04337488 |
| C | 32.53645542 | 14.34698767 | 4.79674120 |
| C | 33.62663327 | 16.34176703 | 4.80729151 |
| C | 31.74346381 | 11.93512780 | 4.78924674 |
| C | 31.41097328 | 9.51496356  | 4.71960507 |
| H | 31.83622693 | 8.50433818  | 4.62601598 |
| C | 30.35214326 | 12.11212232 | 4.95700719 |
| H | 29.95460727 | 13.12854269 | 5.04796611 |
| C | 32.26174905 | 10.62379427 | 4.67176232 |
| H | 33.34653316 | 10.48007171 | 4.54083011 |
| C | 29.51322719 | 10.98986260 | 5.00178130 |
| H | 28.43067478 | 11.14169128 | 5.13204939 |
| C | 30.02730854 | 9.68956048  | 4.88502442 |
| H | 29.35691903 | 8.81842807  | 4.92291696 |
| C | 36.59672656 | 15.54646074 | 4.26608218 |
| H | 35.89231306 | 14.71824362 | 4.13926107 |
| C | 36.09793026 | 16.83000348 | 4.58802525 |
| C | 38.37434599 | 17.71002505 | 4.60316209 |
| H | 39.08450772 | 18.53970869 | 4.73094704 |
| C | 38.87388143 | 16.43097420 | 4.28369091 |
| C | 37.97380699 | 15.36063568 | 4.11941886 |
| H | 38.38020277 | 14.36998974 | 3.86789121 |
| C | 37.00339958 | 17.90763583 | 4.75527207 |
| H | 36.61358954 | 18.90536994 | 5.01305263 |
| C | 40.33290126 | 16.21608844 | 4.11991696 |
| O | 43.71007350 | 18.22101933 | 4.18337860 |
| O | 45.44489540 | 16.86750645 | 3.97073490 |
| H | 45.64567231 | 18.88704808 | 4.38448069 |
| C | 44.94543204 | 18.03131314 | 4.18873573 |
| N | 46.88231500 | 14.95866298 | 4.99583446 |
| H | 46.26200755 | 14.34371556 | 4.36887355 |
| H | 46.52151493 | 15.91341383 | 4.65630089 |
| C | 48.31347432 | 14.77670821 | 4.69675914 |
| H | 48.91883009 | 15.49787804 | 5.27907201 |
| H | 48.62938383 | 13.74817033 | 4.95743574 |
| H | 48.48133773 | 14.94745541 | 3.61727952 |
| C | 46.48307657 | 14.76600837 | 6.40726670 |
| H | 45.39099205 | 14.93363034 | 6.48385053 |
| H | 46.72887555 | 13.73630685 | 6.73076733 |
| H | 47.01989740 | 15.48804450 | 7.05209638 |
| I | 33.28789437 | 21.21964659 | 8.44164466 |
| I | 32.72030545 | 19.13966722 | 6.66743731 |

**Table S6.** The Cartesian coordinates of optimized structures of I<sub>2</sub> molecule adsorbed at site 5 on cluster model at PBE-D3 level of theory.

| atom | <i>x</i>    | <i>y</i>    | <i>z</i>   |
|------|-------------|-------------|------------|
| U    | 43.12479792 | 15.65473203 | 3.66728961 |
| O    | 43.33122409 | 15.67123287 | 5.45251062 |
| O    | 43.06084865 | 15.61309034 | 1.88608690 |
| O    | 42.94032707 | 13.14417553 | 3.69037620 |
| O    | 45.02528387 | 13.87848152 | 3.71027615 |
| C    | 44.16944095 | 12.92072695 | 3.73981173 |
| H    | 44.54732360 | 11.86568411 | 3.80941369 |
| O    | 41.20732049 | 17.09729971 | 3.80132103 |
| O    | 40.84129591 | 14.92331839 | 3.86336872 |
| N    | 32.53025810 | 17.11918977 | 4.64511058 |
| N    | 33.74092010 | 15.05218602 | 4.53921014 |
| N    | 31.36149154 | 15.03346629 | 4.84889718 |
| N    | 30.19533356 | 16.99597888 | 4.94670894 |
| H    | 29.44648183 | 16.30883390 | 5.05638763 |
| N    | 34.79436967 | 17.15584355 | 4.35187366 |
| H    | 34.57174957 | 18.15369797 | 4.38484932 |
| N    | 32.64301926 | 13.05761684 | 4.73674758 |
| H    | 33.61043114 | 12.74806910 | 4.62167906 |
| H    | 28.42750987 | 22.02267838 | 5.06887694 |
| C    | 28.80811880 | 20.99112792 | 5.04083232 |
| C    | 28.41226905 | 18.59339139 | 5.11825729 |
| H    | 27.71429366 | 17.74510074 | 5.20746225 |
| C    | 30.68481388 | 19.43388714 | 4.85591610 |
| H    | 31.75572815 | 19.23562299 | 4.74186347 |
| C    | 27.92604055 | 19.90419812 | 5.15349710 |
| H    | 26.84526202 | 20.07564802 | 5.27065413 |
| C    | 30.18098575 | 20.74153713 | 4.89322722 |
| H    | 30.88496327 | 21.58336004 | 4.80554425 |
| C    | 29.79682917 | 18.34097246 | 4.96910726 |
| C    | 31.41580077 | 16.39023576 | 4.80680946 |
| C    | 32.54477682 | 14.42385109 | 4.71204151 |
| C    | 33.66086298 | 16.38418948 | 4.51858627 |
| C    | 31.69099983 | 12.03934890 | 4.89172554 |
| C    | 31.29026211 | 9.63066363  | 5.01090248 |
| H    | 31.68596261 | 8.60403898  | 4.98579315 |
| C    | 30.30837071 | 12.26750822 | 5.07144232 |
| H    | 29.94224342 | 13.29944076 | 5.09317859 |
| C    | 32.16983975 | 10.70780314 | 4.86338403 |
| H    | 33.24733849 | 10.52318364 | 4.72370075 |

|   |             |             |            |
|---|-------------|-------------|------------|
| C | 29.44042197 | 11.17635372 | 5.21778089 |
| H | 28.36548260 | 11.36888956 | 5.35754771 |
| C | 29.91567618 | 9.85643655  | 5.18961545 |
| H | 29.22273717 | 9.01022456  | 5.30599582 |
| C | 36.64361424 | 15.50968024 | 4.21503052 |
| H | 35.93596216 | 14.67760392 | 4.28986659 |
| C | 36.13907321 | 16.83187986 | 4.24144232 |
| C | 38.43639742 | 17.68645145 | 4.02917132 |
| H | 39.14673830 | 18.52183132 | 3.94690276 |
| C | 38.92768879 | 16.36963325 | 4.00579361 |
| C | 38.01847212 | 15.29580085 | 4.09709127 |
| H | 38.42197787 | 14.27258028 | 4.07631485 |
| C | 37.05783258 | 17.92274857 | 4.15151823 |
| H | 36.67016380 | 18.95248862 | 4.09682311 |
| C | 40.38619054 | 16.11913831 | 3.88508097 |
| O | 43.76495360 | 18.08511438 | 3.54201401 |
| O | 45.49743890 | 16.71527276 | 3.62777663 |
| H | 45.70121978 | 18.77655325 | 3.60672627 |
| C | 45.00019785 | 17.89970978 | 3.59287096 |
| N | 46.92740991 | 15.06027876 | 5.03861545 |
| H | 46.30859843 | 14.32887982 | 4.55182590 |
| H | 46.57268958 | 15.92308336 | 4.50463582 |
| C | 48.35953336 | 14.81563984 | 4.79229249 |
| H | 48.96435755 | 15.64210096 | 5.21259192 |
| H | 48.66996721 | 13.86467149 | 5.26642164 |
| H | 48.53321561 | 14.75390734 | 3.70207343 |
| C | 46.52170397 | 15.16968890 | 6.45744278 |
| H | 45.42975373 | 15.35044789 | 6.49294115 |
| H | 46.76436848 | 14.23098751 | 6.99148085 |
| H | 47.05707556 | 16.01096976 | 6.93789884 |
| I | 37.10480128 | 18.94787295 | 9.78700098 |
| I | 37.28873086 | 18.35843079 | 7.08859054 |

**Table S7.** The Cartesian coordinates of optimized structures of I<sub>2</sub> molecule adsorbed at site 6 on cluster model at PBE-D3 level of theory.

| atom | x           | y           | z          |
|------|-------------|-------------|------------|
| U    | 42.94307626 | 15.82253125 | 4.57113987 |
| O    | 43.06100137 | 16.03284471 | 6.38204208 |
| O    | 42.97540300 | 15.59413780 | 2.80143522 |
| O    | 42.79150911 | 13.34804141 | 4.92725469 |
| O    | 44.85668306 | 14.11198177 | 4.79957881 |
| C    | 44.02631065 | 13.15009924 | 4.97944356 |
| H    | 44.42577021 | 12.12279290 | 5.18728145 |

|   |             |             |            |
|---|-------------|-------------|------------|
| O | 41.02724645 | 17.23020142 | 4.45795060 |
| O | 40.68864326 | 15.07043917 | 4.70050353 |
| N | 32.30847255 | 17.16625897 | 4.57791468 |
| N | 33.54548788 | 15.11534272 | 4.71045136 |
| N | 31.14626576 | 15.07163594 | 4.72294674 |
| N | 29.95544224 | 17.01756372 | 4.60382804 |
| H | 29.20758702 | 16.32257205 | 4.65435292 |
| N | 34.59190033 | 17.22422868 | 4.55849070 |
| H | 34.35822940 | 18.21682534 | 4.48401876 |
| N | 32.45355311 | 13.11306695 | 4.84491576 |
| H | 33.43130415 | 12.81520319 | 4.86112855 |
| H | 28.12924227 | 22.01606657 | 4.30509751 |
| C | 28.52193383 | 20.99047664 | 4.36606331 |
| C | 28.14624478 | 18.59279531 | 4.51772891 |
| H | 27.45184540 | 17.73885507 | 4.57571531 |
| C | 30.42443937 | 19.45554244 | 4.44862155 |
| H | 31.50336060 | 19.26750303 | 4.45325681 |
| C | 27.64492932 | 19.89603155 | 4.44004713 |
| H | 26.55597482 | 20.05568327 | 4.43762729 |
| C | 29.90531119 | 20.75544807 | 4.37134396 |
| H | 30.60541209 | 21.60324235 | 4.31407080 |
| C | 29.54161696 | 18.35475315 | 4.52309306 |
| C | 31.19242781 | 16.42666573 | 4.63408837 |
| C | 32.34484942 | 14.47685638 | 4.75685860 |
| C | 33.45780973 | 16.44567598 | 4.62030317 |
| C | 31.50113993 | 12.08621138 | 4.91060183 |
| C | 31.11419638 | 9.67687026  | 5.06417797 |
| H | 31.52106008 | 8.65638170  | 5.12983348 |
| C | 30.10422829 | 12.29825533 | 4.89573625 |
| H | 29.72753660 | 13.32454094 | 4.82981190 |
| C | 31.99374682 | 10.76194587 | 4.99583807 |
| H | 33.08222717 | 10.58955625 | 5.00815567 |
| C | 29.23655408 | 11.19930695 | 4.96491983 |
| H | 28.15049580 | 11.37963565 | 4.95222030 |
| C | 29.72558989 | 9.88679473  | 5.04920176 |
| H | 29.03264176 | 9.03430016  | 5.10286049 |
| C | 36.46750184 | 15.60224908 | 4.68694327 |
| H | 35.76448594 | 14.76696146 | 4.77124434 |
| C | 35.95241666 | 16.91639895 | 4.57021398 |
| C | 38.23127101 | 17.79187081 | 4.46157370 |
| H | 38.93536711 | 18.63191147 | 4.37393844 |
| C | 38.74427167 | 16.48286044 | 4.57799390 |
| C | 37.84889178 | 15.40030066 | 4.69087904 |

|   |             |             |            |
|---|-------------|-------------|------------|
| H | 38.26267200 | 14.38523888 | 4.78208894 |
| C | 36.85552997 | 18.00564033 | 4.45895653 |
| H | 36.45783243 | 19.02926120 | 4.36847560 |
| C | 40.20388008 | 16.25272657 | 4.57915402 |
| O | 43.55358862 | 18.23715404 | 4.29503973 |
| O | 45.28641888 | 16.88140559 | 4.44206954 |
| H | 45.48944228 | 18.93920869 | 4.30923210 |
| C | 44.79161498 | 18.06187484 | 4.34557489 |
| N | 47.23879048 | 15.18888135 | 4.82883890 |
| H | 46.43291260 | 14.51329907 | 5.02223534 |
| H | 46.67160509 | 16.09631559 | 4.80461521 |
| C | 47.72180391 | 14.92589334 | 3.45616255 |
| H | 48.45892926 | 15.69672377 | 3.16115836 |
| H | 48.19668112 | 13.92748397 | 3.40764327 |
| H | 46.85560128 | 14.95845410 | 2.77048076 |
| C | 48.27050034 | 15.17998261 | 5.88439425 |
| H | 47.79896498 | 15.39901648 | 6.86071208 |
| H | 48.75628333 | 14.18649323 | 5.92753062 |
| H | 49.03530270 | 15.94977657 | 5.66709882 |
| I | 47.14917281 | 15.95652715 | 9.83977489 |
| I | 44.97868279 | 16.00252936 | 8.10791749 |

**Table S8.** The lattice parameters of the periodic UOF at spin multiplicity of 1 and 3 with  $U_{\text{eff}}$  values ranging from 0–6.

| $U_{\text{eff}}$ (eV) | Lattice parameters     |        |        |                    |                        |        |        |                    |
|-----------------------|------------------------|--------|--------|--------------------|------------------------|--------|--------|--------------------|
|                       | Spin multiplicity of 1 |        |        |                    | Spin multiplicity of 3 |        |        |                    |
|                       | a(Å)                   | b(Å)   | c(Å)   | V(Å <sup>3</sup> ) | a(Å)                   | b(Å)   | c(Å)   | V(Å <sup>3</sup> ) |
| 0                     | 31.918                 | 18.606 | 13.154 | 7787.36            | 31.919                 | 18.610 | 13.224 | 7830.60            |
| 1                     | 31.919                 | 18.607 | 13.148 | 7783.96            | 31.919                 | 18.610 | 13.224 | 7830.58            |
| 2                     | 31.919                 | 18.606 | 13.143 | 7780.72            | 31.919                 | 18.610 | 13.224 | 7830.59            |
| 3                     | 31.919                 | 18.605 | 13.134 | 7775.20            | 31.919                 | 18.610 | 13.224 | 7830.56            |
| 4                     | 31.919                 | 18.606 | 13.160 | 7791.01            | 31.919                 | 18.614 | 13.217 | 7828.04            |
| 5                     | 31.919                 | 18.606 | 13.161 | 7791.82            | 31.919                 | 18.614 | 13.216 | 7827.46            |
| 6                     | 31.919                 | 18.608 | 13.207 | 7819.99            | 31.916                 | 18.609 | 13.204 | 7817.55            |

**Table S9.** The energies of the periodic UOF system at spin multiplicity of 1 and 3 with  $U_{\text{eff}}$  values ranging from 0–6.

| $U_{\text{eff}}$ (eV) | Energy (a.u.)          |                        |
|-----------------------|------------------------|------------------------|
|                       | spin multiplicity of 1 | spin multiplicity of 3 |
| 0                     | -3285.126              | -3285.044              |
| 1                     | -3284.927              | -3284.839              |
| 2                     | -3284.735              | -3284.637              |
| 3                     | -3284.552              | -3284.446              |
| 4                     | -3284.374              | -3284.269              |
| 5                     | -3284.202              | -3284.098              |
| 6                     | -3284.027              | -3283.934              |

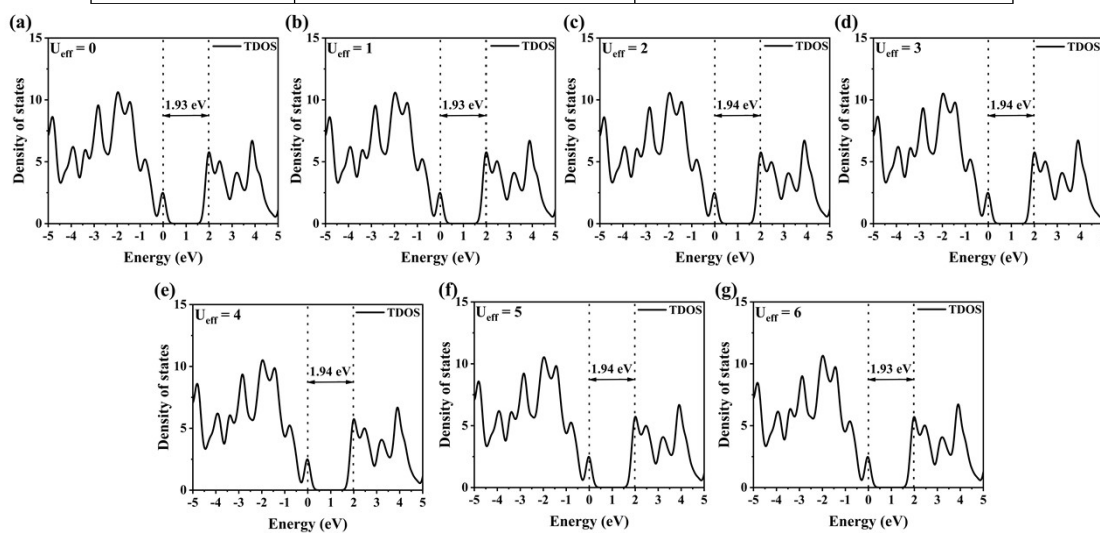

**Figure S2.** (a-g) Density of states (DOS) of the periodic UOF system with  $U_{\text{eff}}$  values ranging from 0–6 eV. The Fermi levels are set to zero.

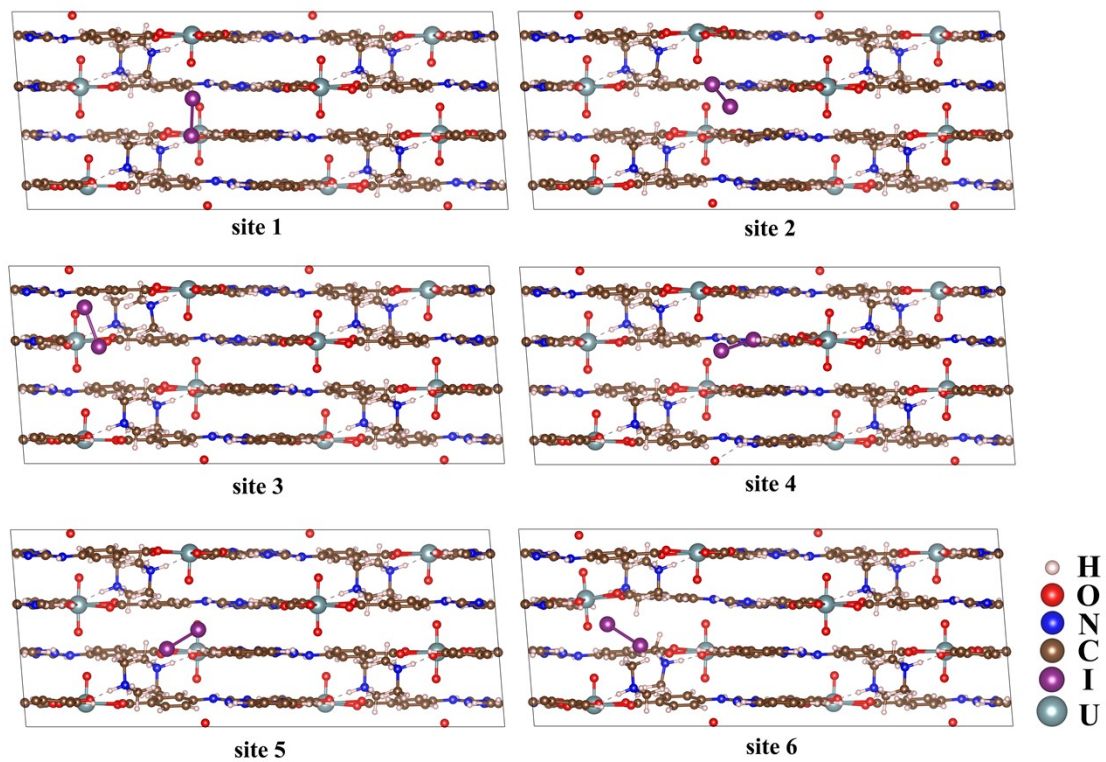

**Figure S3.** Optimized structures of  $I_2$  molecule adsorbed at different sites in the periodic UOF model.
